# Supplementary material
Source: Springer Nature journal article supplement (https://www.springermedizin.de/resource/supplementary/12913_2012_2956_MOESM4_ESM.pdf/9531902)
Supplement: MOESM4 [file 9531902]

## Health Delivery System

Organization Structure

Registry group

Polytrauma Network System

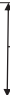

## Societal Determinants

Norms - Stigma

## External Environment

Negative Enabling – Barriers

## Population Characteristics

Predisposing

Age

Race/Ethnicity

Gender

Marital Status

Enabling

Employment

Need

Exposure to combat, blasts

Mental health problems

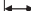

## Use of Health Services

Site - VA
